# 1 APEC: An accesson-based method for single-cell chromatin 2 accessibility analysis

3

4 Bin Li<sup>1,3</sup>, Young Li<sup>1,3</sup>, Kun Li<sup>1</sup>, Lianbang Zhu<sup>1</sup>, Qiaoni Yu<sup>1</sup>, Jingwen Fang<sup>1</sup>, Pengfei Cai<sup>1</sup>, Chen Jiang<sup>1</sup>, Kun Qu<sup>1,2,\*</sup>

5

6 Affiliation

7 <sup>1</sup>Division of Molecular Medicine, Hefei National Laboratory for Physical Sciences at Microscale, The CAS  
8 Key Laboratory of Innate Immunity and Chronic Disease, School of Life Sciences, University of Science and  
9 Technology of China

10 <sup>2</sup>CAS Center for Excellence in Molecular Cell Sciences, University of Science and Technology of China

11 <sup>3</sup>Cofirst authors

12

13 \*Correspondence: Kun Qu ([gukun@ustc.edu.cn](mailto:gukun@ustc.edu.cn))

14

## 15 **Contact Information**

16 Kun Qu, Ph.D.

17 Division of Molecular Medicine, Hefei National Laboratory for Physical Sciences at Microscale, The CAS  
18 Key Laboratory of Innate Immunity and Chronic Disease, School of Life Sciences, University of Science and  
19 Technology of China

20 Hefei, Anhui, China, 230027

21 Email: [gukun@ustc.edu.cn](mailto:gukun@ustc.edu.cn)

22 Phone: +86-551-63606257

23

24 **Abstract:**

25

26         The development of sequencing technologies has promoted the survey of genome-wide  
27 chromatin accessibility at single-cell resolution; however, comprehensive analysis of single-cell  
28 epigenomic profiles remains a challenge. Here, we introduce an accessibility pattern-based  
29 epigenomic clustering (APEC) method, which classifies each individual cell by groups of  
30 accessible regions with synergistic signal patterns termed “accessions”. By integrating with other  
31 analytical tools, this python-based APEC package greatly improves the accuracy of unsupervised  
32 single-cell clustering for many different public data sets. APEC also identifies significant  
33 differentially accessible sites, predicts enriched motifs, and projects pseudotime trajectories.  
34 Furthermore, we developed a fluorescent tagmentation- and FACS-sorting-based single-cell  
35 ATAC-seq technique named ftATAC-seq and investigated the per cell regulome dynamics of  
36 mouse thymocytes. Associated with ftATAC-seq, APEC revealed a detailed epigenomic  
37 heterogeneity of thymocytes, characterized the developmental trajectory and predicted the  
38 regulators that control the stages of maturation process. Overall, this work illustrates a powerful  
39 approach to study single-cell epigenomic heterogeneity and regulome dynamics.

40

## 41 INTRODUCTION

42

43 As a technique for probing genome-wide chromatin accessibility in a small number of cells  
44 *in vivo*, the assay for transposase-accessible chromatin with high-throughput sequencing (ATAC-  
45 seq) has been widely applied to investigate the cellular regulomes of many important biological  
46 processes<sup>1</sup>, such as hematopoietic stem cell (HSC) differentiation<sup>2-4</sup>, embryonic development<sup>5, 6</sup>,  
47 neuronal activity and regeneration<sup>7-10</sup>, tumor cell metastasis<sup>11</sup>, and patient responses to  
48 anticancer drug treatment<sup>12</sup>. Recently, several experimental schemes have been developed to  
49 capture chromatin accessibility at single-cell/nucleus resolution, i.e., single-cell ATAC-seq  
50 (scATAC-seq)<sup>13</sup>, single-nucleus ATAC-seq (snATAC-seq)<sup>14, 15</sup>, and single-cell combinatorial  
51 indexing ATAC-seq (sci-ATAC-seq)<sup>16, 17</sup>, which significantly extended researchers' ability to  
52 uncover cell-to-cell epigenetic variation and other fundamental mechanisms that generate  
53 heterogeneity from identical DNA sequences. By contrast, the in-depth analysis of single-cell  
54 chromatin accessibility profiles for this purpose remains a challenge. Numerous efficient  
55 algorithms have been developed to accurately normalize, cluster and visualize cells from single-  
56 cell transcriptome sequencing profiles, including but not limited to SCnorm<sup>18</sup>, Seurat<sup>19</sup>, SC3<sup>20</sup>,  
57 SIMLR<sup>21</sup>, bigSCale<sup>22</sup>, and SCANPY<sup>23</sup>. However, most of these algorithms are not directly  
58 compatible with a single-cell ATAC-seq dataset, for which the signal matrix is much sparser. To  
59 characterize scATAC-seq data, the Greenleaf lab developed an algorithm named chromVAR<sup>24</sup>,  
60 which aggregates mapped reads at accessible sites based on annotated motifs of known  
61 transcription factors (TFs) and thus projects the sparse per accessible peak per cell matrix to a  
62 bias-corrected deviation per motif per cell matrix and significantly stabilizes the data matrix for  
63 downstream clustering analysis. Other mathematical tools, such as the latent semantic indexing  
64 (LSI) and density-based clustering methods, have also been applied to process single-  
65 cell/nucleus ATAC-seq data<sup>15, 17</sup>. However, none of these methods can precisely distinguish cells  
66 from low sequencing depth without prior knowledge of essential principle components or TF motifs.  
67 Therefore, a refined algorithm is urgently needed to better categorize cell subgroups with minor  
68 differences under low coverage, thereby providing a deeper mechanistic understanding of single-  
69 cell epigenetic heterogeneity and regulation.

70

71

72

## 73 RESULTS

74

### 75 Accession-based algorithm improves single-cell clustering

76

77 Here, we introduce a new single-cell chromatin accessibility analysis toolkit named APEC  
78 (accessibility pattern-based epigenomic clustering), which combines peaks with the same signal  
79 fluctuation among all single cells into peak groups, termed "accessions", and converts the original  
80 sparse cell-peak matrix to a much denser cell-accession matrix for cell type categorization ([Figure](#)  
81 [1a](#)). In contrast to previous motif-based methods (e.g., chromVAR), this accession-based  
82 reduction scheme naturally groups synergistic accessible regions together without a priori  
83 knowledge of genetic information (such as TF motifs) and provides more efficient, accurate and  
84 rapid cell clustering from single-cell ATAC-seq profiles. More conveniently, APEC integrates all  
85 necessary procedures, from raw sequence trimming, alignment, and quality control  
86 ([Supplementary Figure 1a-1c](#)) to cell clustering, motif enrichment, and pseudotime trajectory  
87 prediction into a head-to-toe program package that has been made available on GitHub  
88 (<https://github.com/QuKunLab/APEC>).

89 To test the performance of APEC, we first obtained data from previous publications, which  
90 performed scATAC-seq on lymphoid-primed multipotent progenitors (LMPPs), monocytes, HL-60  
91 lymphoblastoid cells (HL60), and blast cells and leukemic stem cells (LSCs) from two acute  
92 myeloid leukemia (AML) patients<sup>24</sup>. Compared to the motif-based method chromVAR<sup>24, 25</sup>, this  
93 new accession-based algorithm more precisely and clearly clustered cells into their corresponding  
94 identities ([Figure 1b-1e](#)). For instance, distinct cell types, such as LMPPs, monocytes and HL60  
95 cells, were more vividly separated from each other (Adjusted Rand Index (ARI)=0.95, compared  
96 to ARI=0.59 for chromVAR); similar cells, such as the blast cells and LSCs from two AML patients,  
97 were ambiguous in chromVAR (ARI=0.36) but were more clearly categorized in both the  
98 hierarchical clustering heatmap and the tSNE scattering plot in APEC (ARI=0.69). The  
99 contribution of the minor differences between similar cells is aggregated in accessions but diluted  
100 in motifs. For example, APEC identified prominent superenhancers around the E3 ligase inhibitor  
101 gene *N4BP1*<sup>26</sup> and the MLL fusion gene *GPHN*<sup>27</sup> in the LSC cells from AML patient 1 (P1-LSC)  
102 but not in the other cell types ([Figure 1f](#), [Supplementary Figure 1d](#)). We noticed that all peaks in  
103 these superenhancers were classified into one accession that was critical for distinguishing P1-  
104 LSCs from P2-LSCs, P1-blast cells and P2-blast cells. However, these peaks were distributed in  
105 multiple TF motifs, which significantly diluted the contributions of the minor differences  
106 ([Supplementary Figure 1e-f](#)). To test the robustness of APEC at low sequencing depth, we

107 randomly selected reads from the raw data and calculated the ARI values for each sampled data.  
108 Compared with chromVAR, the APEC algorithm exhibits better robustness at sequencing depth  
109 as low as 10% of the original data (Supplementary Figure 1g).

110

### 111 **APEC is applicable to multiple single-cell chromatin detection techniques**

112

113 To evaluate the compatibility and performance of APEC with other single-cell chromatin  
114 accessibility detection techniques, such as snATAC-seq<sup>15</sup>, transcript-indexed scATAC-seq<sup>28</sup> and  
115 sciATAC-seq<sup>16</sup>, APEC was also tested with the data sets generated by those experiments. For  
116 example, APEC discovered 10 cell subpopulations in adult mouse forebrain snATAC-seq data<sup>15</sup>,  
117 including three clusters of excitatory neurons (EX1-3), five groups of inhibitory neurons (IN1-4),  
118 astroglia cells (AC), oligodendrocyte cells (OC), and microglial cells (MG; Figure 2a & 2b), as  
119 defined by the chromatin accessibilities at the loci of cell type-specific genes (Figure 2c).  
120 Compared to published results<sup>15</sup>, APEC identified 4 rather than 2 distinct inhibitory subpopulations,  
121 among which IN1 and IN4 were more similar and IN2 and IN3 were more distinct (Figure 2d). The  
122 motif enrichment analysis module in APEC identified cell type-specific regulators that are  
123 consistent with previous publications<sup>15</sup>. For example, the NEUROD1 and OLIG2 motifs were  
124 generally enriched on excitatory clusters (EX1~3); the MEF2C motif was more enriched on EX3  
125 than on EX1/2 neurons; the motifs of MEIS2 and DLX2 were differentially enriched on two  
126 subtypes of inhibitory neurons (IN2 and IN3, respectively); and the NOTO, SOX2, and ETS1  
127 motifs were enriched on the AC, OC, and MG clusters, respectively (Figure 2e). These results  
128 suggest that APEC is capable of identifying cell subtype-specific regulators.

129 Since the divergence of the gene expression levels in a single cell is much greater than  
130 that of the chromatin accessibilities, single-cell transcriptome analysis usually identifies more cell  
131 subpopulations. Therefore, it is critical to anchor the cell types identified from scATAC-seq to  
132 those from scRNA-seq. Lake et al. identified dozens of excitatory and inhibitory neuronal subtypes  
133 in the adult human brain using snDrop-seq and scTHS-seq experiments<sup>14</sup> and provided tens of  
134 signature genes that distinguished these cell types. Interestingly, the accessions that represent  
135 these signature genes were also distinctly enriched at corresponding clusters of neurons. For  
136 example, the upright part of the EX1 cell cluster in snATAC-seq enriched accessions represents  
137 the genes *Cbln2* and *Col5a2*, which are specific genes in clusters Ex1/2/3a that were defined in  
138 the scDrop-seq data (Figure 2f). The left part of the EX1 cell cluster in snATAC-seq matched the  
139 Ex3b/3c/3e clusters in scDrop-seq (marked by *Nefm*), EX2 matched Ex4/5/6 (marked by *Foxp2*  
140 and *Pcp4*), and EX3 matched Ex3d (marked by *Phactr2*). The same method also works to anchor

141 inhibitory neurons, as the IN2 cells in the snATAC-seq data corresponded to the In1/2 clusters in  
142 the scDrop-seq data (marked by *Cck* and *Cnr1*), the IN3 cells corresponded to the In6b/8 clusters  
143 (marked by *Stxbp6* and *Tac1*), the IN4 cells corresponded to the In1c/3 clusters (marked by *Vip*  
144 and *Tshz2*), and the low right branch of IN1 corresponded to the In7 cluster (marked by *Npy*)  
145 (Figure 2g). These results highlight the potential advantages of the accesson-based method for  
146 integrative analysis of scRNA-seq and scATAC-seq data.

147 In addition, due to the sparser per-cell-per-peak fragment count matrix, more than 29.7%  
148 (946 out of 3034) of high-quality cells were previously unable to be correctly assigned into any  
149 subpopulation of interest<sup>15</sup>, but APEC successfully categorized all cells into their corresponding  
150 subtypes, confirming its high sensitivity. In contrast, chromVAR misclustered AC and EX4 with  
151 inhibitory neurons, although the same parameters were applied (Supplementary Figure 2a-2c).  
152 These results confirm that this accesson-based APEC method can better distinguish and  
153 categorize single cells with great sensitivity and reliability.

154

## 155 **APEC constructs a pseudotime trajectory that predicts cell differentiation lineage**

156

157 Cells are not static but dynamic entities, and they have a history, particularly a  
158 developmental history. Although single-cell experiments often profile a momentary snapshot, a  
159 number of remarkable computational algorithms have been developed to pseudo-order cells  
160 based on the different points they were assumed to occupy in a trajectory, thereby leveraging  
161 biological asynchrony<sup>29,30</sup>. For instance, Monocle<sup>30,31</sup> constructs the minimum spanning tree, and  
162 Wishbone<sup>32</sup> and Spring<sup>33</sup> construct the nearest neighbor graph from single-cell transcriptome  
163 profiles. These tools have been widely used to depict neurogenesis<sup>34</sup>, hematopoiesis<sup>35,36</sup> and  
164 reprogramming<sup>37</sup>. APEC integrates the Monocle algorithm into the accesson-based method and  
165 enables pseudotime prediction from scATAC-seq data<sup>38</sup> and was applied to investigate HSC  
166 differentiation lineages (Figure 3a). Principal component analysis (PCA) of the accesson matrix  
167 revealed multiple stages of the lineage during HSC differentiation (Figure 3b) and was consistent  
168 with previous publications<sup>3,38</sup>. After utilizing the Monocle package, APEC provided more precise  
169 pathways from HSCs to the differentiated cell types (Figure 3c). In addition to the differentiation  
170 pathways to MEP cells through the CMP state and to CLP cells through the LMPP state, MPP  
171 cells may differentiate into GMP cells through two distinct trajectories: Path A through the CMP  
172 state and Path B through the LMPP state, which is consistent with the composite model of HSC  
173 and blood lineage commitment<sup>39</sup>. Notably, APEC suggested that CD34<sup>+</sup> plasmacytoid dendritic

174 cells (pDCs) from the bone marrow ([Supplementary Figure 3](#)) were derived from CLP cells on the  
175 pseudotime trajectory ([Figure 3c](#)), which also agrees with a previous report<sup>40</sup>. Furthermore, APEC  
176 is capable of evaluating the deviation of each TF along the single-cell trajectory to determine the  
177 regulatory mechanisms during HSC differentiation. As expected, the HOX motif is highly enriched  
178 in the accessible sites of HSCs/MPP cells, as are the GATA1, CEBPB and TCF4 motifs, which  
179 exhibit gradients that increase along the erythroid, myeloid and lymphoid differentiation pathways,  
180 respectively<sup>38</sup> ([Figure 3d](#)). In addition, we can see that the TF regulatory strategies of the two  
181 paths from MMPs towards GMP cells were very different. Finally, we generated a hematopoiesis  
182 tree based on the APEC analysis ([Figure 3e](#)).

183

### 184 **APEC reveals the single-cell regulatory heterogeneity of thymocytes**

185

186 T cells generated in the thymus play a critical role in the adaptive immune system, and  
187 the development of thymocytes can be divided into 3 main stages based on the expression of the  
188 surface markers CD4 and CD8, namely, CD4 CD8 double-negative (DN), CD4 CD8 double-  
189 positive (DP) and CD4 or CD8 single-positive (CD4SP or CD8SP, respectively) stages<sup>41</sup>. However,  
190 due to technical limitations, our genome-wide understanding of thymocyte development at single-  
191 cell resolution remains unclear. Typically, more than 80% of thymocytes stay in the DP stage in  
192 the thymus, whereas DN cells account for only approximately 3% of the thymocyte population. To  
193 eliminate the impacts of great differences in proportion, we developed a fluorescent tagmentation-  
194 and FACS-sorting-based scATAC-seq strategy (ftATAC-seq), which combined the advantages of  
195 ATAC-seq<sup>42</sup> and Pi-ATAC-seq<sup>43</sup> to manipulate the desired number of target cells by indexed  
196 sorting ([Figure 4a](#)). Tn5 transposomes were fluorescently labeled in each cell to evaluate the  
197 tagmentation efficiency so that cells with low ATAC signals could be gated out easily  
198 ([Supplementary Figure 4a](#), [Figure 4b](#)). With ftATAC-seq, we acquired high-quality chromatin  
199 accessibility data for 352 index-sorted DN, DP, CD4SP, and CD8SP single cells and 352 mixed  
200 thymocytes ([Figure 4b](#)). We applied APEC to mouse thymocyte ftATAC-seq data to investigate  
201 the chromatin accessibility divergence during the developmental process and to reveal refined  
202 regulome heterogeneity at single-cell resolution. Taking into account all 130685 peaks called from  
203 the raw sequencing data, APEC aggregated 600 accessions and successfully assigned over 92%  
204 of index-sorted DN, DP, CD4SP and CD8SP cells into the correct subpopulations ([Figure 4c](#), [4d](#)),  
205 providing a much better classification than chromVAR ([Supplementary Figure 4b](#), [4c](#)), for which  
206 this rate was only 56%. As expected, the majority of randomly sorted and mixed thymocytes were  
207 classified into DP subtypes based on similarity hierarchical clustering, which was consistent with

208 the cellular subtype proportions in the thymus. APEC further classified all thymocytes into 14  
209 subpopulations, including 2 DN, 7 DP, 1 CD4SP, 2 CD8SP, 1 coherence (Coh.A) and 1 transition  
210 (Tran.A) state, suggesting that extensive epigenetic heterogeneity exists among cells with the  
211 same CD4 and CD8 surface markers (Figure 4e). For instance, there are four main subtypes of  
212 DN cells, according to the expression of the surface markers CD44 and CD25<sup>44</sup>, while two clusters  
213 were identified in ftATAC-seq. The accessibility signals around the *Il2ra* (Cd25) and *Cd44* gene  
214 loci demonstrated that DN.A1 comprised CD44<sup>+</sup>CD25<sup>-</sup> and CD44<sup>+</sup>CD25<sup>+</sup> DN subtypes (DN1 and  
215 DN2), and DN.A2 cells comprised CD44<sup>-</sup>CD25<sup>+</sup> and CD44<sup>-</sup>CD25<sup>-</sup> subtypes (DN3 and DN4),  
216 suggesting significant chromatin changes between DN2 and DN3 cell development (Figure 4f).

217 Many TFs have been reported to be essential in regulating thymocyte development, and  
218 we found that their motifs were remarkably enriched at different stages during the process (Figure  
219 4g). For instance, Runx3 is well known for regulating CD8SP cells<sup>45</sup>, and we observed significant  
220 enrichment of the RUNX motif on DN cells and a group of CD8SP cells. Similarly, the TCF<sup>46, 47</sup>,  
221 RORC<sup>48</sup> and NFkB<sup>49</sup> family in regulating the corresponding stages during this process. More  
222 enriched TF motifs in each cell subpopulation were also observed, suggesting significant  
223 regulatory divergence in thymocytes (Supplementary Figure 4d). Interestingly, two clusters of  
224 CD8SP cells appear to be differentially regulated based on motif analysis, in which CD8.A1 cells  
225 are closer to DP cells, while CD8.A2 cells are more distant at the chromatin level, suggesting that  
226 CD8.A2 cells are more mature CD8SP cells. In addition to the well-defined subtypes, APEC also  
227 found a mixed cell population without specific features that was termed the coherence state  
228 (Coh.A) and a transitional population between DP and SP cells (Tran.A).

229 APEC is capable of integrating single-cell transcriptional and epigenetic information by  
230 scoring gene sets of interest based on their nearby peaks from scATAC-seq, thereby converting  
231 the chromatin accessibility signals to values that are comparable to gene expression profiles  
232 (online **Methods**). To test the performance of this integrative analysis approach and to evaluate  
233 the accuracy of thymocyte classification by APEC, we assayed the transcriptomes of single  
234 thymocytes and obtained 357 high-quality scRNA-seq profiles using the SMART-seq2 protocol<sup>50</sup>.  
235 Unsupervised analysis of gene expression profiles clustered these thymocytes into 13 groups in  
236 Seurat<sup>19</sup> (Supplementary Figure 5a, 5b), and each subpopulation was identified based on known  
237 feature genes (Supplementary Figure 5c, 5d). We then compared the adjusted scores obtained  
238 from APEC with the single-cell RNA expression profile and observed a strong correlation between  
239 the subtypes identified from the transcriptome and the subtypes identified from chromatin  
240 accessibility (Figure 4h), confirming the reliability and stability of cellular classification using APEC.

241



## 242 **APEC reconstructs the thymocyte developmental trajectory from ftATAC-seq profiles**

243

244 APEC is capable of constructing a pseudotime trajectory and then predicting the cell  
245 differentiation lineage from a “snapshot” of single-cell epigenomes (Figure 3). We applied APEC  
246 to recapitulate the developmental trajectory and thereby reveal the single-cell regulatory dynamics  
247 during the maturation of thymocytes. Pseudotime analysis based on single-cell ftATAC-seq data  
248 shaped thymocytes into 5 developing stages (Figure 5a, Supplementary Figure 6a-b), where most  
249 of the cells in stages 1, 2, 4, and 5 were DN, DP, CD8SP and CD4SP cells, respectively. APEC  
250 also identified a transitional stage 3, which consisted of DP, coherence and transitional cells.  
251 Interestingly, the pseudotime trajectory suggests three developmental pathways for this process,  
252 one of which started with stage 1 (DN) and ended in stage 2 (DP), and the other two of which  
253 started with stage 1 (DN), went through a transitional stage 3 (a mixture of DP, Coh and Tran)  
254 and then bifurcated into stage 4 (CD8SP) and 5 (CD4SP). The predicted developmental trajectory  
255 could also be confirmed by the gene expression of surface markers, such as Cd4, Cd8, Runx3  
256 and Ccr7 (Figure 5b). To evaluate the gene ontology (GO) enrichments over the entire process,  
257 we implemented an accession-based GO module in APEC, which highlights the significance of  
258 the association between cells and biological function (Figure 5c). For instance, T cell selections,  
259 including  $\beta$ -selection, positive selection and negative selection, start from the DN3 stage.  
260 Consistent with this process, we observed a strong “T cell selection” GO term on the trajectory  
261 path after DN.A1. Since TCR signals are essential for T cell selection, we also observed the “T  
262 cell activation” GO term accompanied by “T cell selection”. Meanwhile, the regulation of protein  
263 binding signal was also decreased at SP stages, indicating the necessity of weak TCR signal for  
264 the survive of SP T cells during negative selection.

265 To further uncover the regulatory mechanism underlying this developmental process,  
266 APEC was implemented to identify stage-specific enriched TFs along the trajectory and pinpoint  
267 the “pseudotime” at which the regulation occurs. In addition to the well-studied TFs mentioned  
268 above (Figure 4g, Supplemental Figure 4c), APEC also identified Zeb1<sup>51</sup>, Ctcf<sup>52</sup> and Id4 as  
269 potential stage-specific regulators (Figure 5d). Interestingly, the Id4 motif enriched on DP cells  
270 was also reported to regulate apoptosis in other cell types<sup>53, 54</sup>. Associated with the fact that the  
271 vast majority of DP thymocytes die because of a failure of positive selection<sup>55</sup>, we hypothesize  
272 that stage 2 may be the path towards DP cell apoptosis. We then checked the distribution of DP  
273 cells along the stage 2 trajectory and found that most DP.A1 cells were scattered in “early” stage  
274 2, and they were enriched with GO terms such as “T cell selection”, “cell activation” and  
275 “differentiation” (Figure 5e, Supplementary Figure 6c). However, most DP.A5-A6 cells were

276 distributed at the end of stage 2, and their principle accessions were enriched with GO terms such  
277 as “apoptosis” and “chromatin modification”. These results suggest that a majority of DP  
278 thymocytes undergo T cell selection and enter an apoptosis state. Although it is believed that  
279 more than 95% of DP thymocytes are subjected to death in positive selection, only a small  
280 proportion of apoptotic cells could be detected in a snapshot of the thymus. By comparing the  
281 number of cells near stage 3 with all the cells in stage 2, we estimated that ~3-5% of cells would  
282 survive positive selection, which is consistent with previous publications<sup>56, 57</sup>. Our data suggest  
283 that before entering an apoptotic stage, DP thymocytes that fail selection could have already  
284 committed to apoptosis at the chromatin level.

285

## 286 **DISCUSSION**

287

288 Here, we introduced an accession-based algorithm for single-cell chromatin accessibility  
289 analysis. Without any prior information (such as motifs), this approach generated more refined  
290 cell groups with reliable biological functions and properties. Integrating the new algorithm with all  
291 necessary chromatin sequencing data processing tools, APEC provides a comprehensive  
292 solution for transforming raw experimental single-cell data into final visualized results. In addition  
293 to better clustering of subtle cell subtypes, APEC is also capable of locating potential specific  
294 superenhancers, searching enriched motifs, estimating gene opening scores, and building time-  
295 dependent cell developmental trajectories, and it is compatible with many existing single-cell  
296 accessibility datasets. Despite these advantages, the biological implications of accessions are still  
297 obscure, especially for those that involve only a small number of peaks; therefore, further  
298 investigations may require uncovering the biology that underlies accessions.

299 To evaluate the performance of this approach in the context of the immune system, we  
300 also adopted APEC with scATAC-seq technology to investigate the regulome dynamics of the  
301 thymic development process. We developed a novel method of ftATAC-seq that captures Tn5-  
302 tagged single cells of interest and outlines the chromatin accessibility heterogeneity and dynamics  
303 during this process. Coordinated with essential cell surface markers, APEC provided a much more  
304 in-depth classification of thymocytes than the conventional DN, DP, CD4SP and CD8SP stages  
305 based on single-cell chromatin status. By reconstructing the developmental pseudotime trajectory,  
306 APEC discovered a transitional stage before thymocytes bifurcate into CD4SP and CD8SP cells  
307 and inferred that one of the stages leads to cell apoptosis. APEC analysis suggested that DP cells

308 were gradually programmed to undergo apoptosis at the chromatin level; however, further studies  
309 are needed to fully understand the regulatory mechanism of this process.

310

### 311 **Acknowledgments**

312 This work was supported by the National Key R&D Program of China (2017YFA0102903 to K.Q.)  
313 and by National Natural Science Foundation of China grants 91640113 (to K.Q.) and  
314 31771428 (to K.Q.). It was also supported by Anhui Provincial Natural Science Foundation grant  
315 BJ2070000097 (to B.L.). We thank the Howard Chang lab at Stanford University for helpful  
316 discussion. We thank the USTC supercomputing center and the School of Life Science  
317 Bioinformatics Center for providing supercomputing resources for this project.

318

### 319 **Authors' contributions**

320 KQ, BL and YL conceived the project, BL developed the APEC software and performed all data  
321 analysis with helps from QY, JF, PC, and CJ. YL developed ftATAC-seq technique and performed  
322 all scATAC-seq and scRNA-seq experiments with helps from LZ. KL analyzed scRNA-seq data.  
323 BL, YL and KQ wrote the manuscript with inputs from all other authors.

324

### 325 **Data and code availability**

326 Mouse thymocytes ftATAC-seq data can be obtained from the Genome Sequence Archive at BIG  
327 Data Center with the accession number CRA001267 and is available via  
328 <http://bigd.big.ac.cn/gsa/s/yp1164Et>. Other published data sets used in this study are available  
329 from NIH GEO with accession numbers GSE74310<sup>3</sup>, GSE65360<sup>13</sup>, GSE96772<sup>38</sup>, and  
330 GSE100033<sup>15</sup>. APEC pipeline can be downloaded from the GitHub website  
331 (<https://github.com/QuKunLab/APEC>).

332

333

## 334 REFERENCES

- 335 1. Buenrostro, J.D., Giresi, P.G., Zaba, L.C., Chang, H.Y. & Greenleaf, W.J. Transposition of native  
336 chromatin for fast and sensitive epigenomic profiling of open chromatin, DNA-binding proteins  
337 and nucleosome position. *Nat Methods* **10**, 1213-1218 (2013).
- 338 2. Ye, M. et al. Hematopoietic Differentiation Is Required for Initiation of Acute Myeloid Leukemia.  
339 *Cell Stem Cell* **17**, 611-623 (2015).
- 340 3. Corces, M.R. et al. Lineage-specific and single-cell chromatin accessibility charts human  
341 hematopoiesis and leukemia evolution. *Nat Genet* **48**, 1193-1203 (2016).
- 342 4. Yu, V.W.C. et al. Epigenetic Memory Underlies Cell-Autonomous Heterogeneous Behavior of  
343 Hematopoietic Stem Cells. *Cell* **167**, 1310-1322 e1317 (2016).
- 344 5. Wu, J. et al. The landscape of accessible chromatin in mammalian preimplantation embryos.  
345 *Nature* **534**, 652-657 (2016).
- 346 6. Wu, J. et al. Chromatin analysis in human early development reveals epigenetic transition during  
347 ZGA. *Nature* **557**, 256-260 (2018).
- 348 7. Jorstad, N.L. et al. Stimulation of functional neuronal regeneration from Muller glia in adult mice.  
349 *Nature* **548**, 103-107 (2017).
- 350 8. Su, Y. et al. Neuronal activity modifies the chromatin accessibility landscape in the adult brain.  
351 *Nat Neurosci* **20**, 476-483 (2017).
- 352 9. Xiang, Y. et al. Fusion of Regionally Specified hPSC-Derived Organoids Models Human Brain  
353 Development and Interneuron Migration. *Cell Stem Cell* **21**, 383-398 e387 (2017).
- 354 10. de la Torre-Ubieta, L. et al. The Dynamic Landscape of Open Chromatin during Human Cortical  
355 Neurogenesis. *Cell* **172**, 289-304 e218 (2018).
- 356 11. Denny, S.K. et al. Nfib Promotes Metastasis through a Widespread Increase in Chromatin  
357 Accessibility. *Cell* **166**, 328-342 (2016).
- 358 12. Qu, K. et al. Chromatin Accessibility Landscape of Cutaneous T Cell Lymphoma and Dynamic  
359 Response to HDAC Inhibitors. *Cancer Cell* **32**, 27-41 e24 (2017).
- 360 13. Buenrostro, J.D. et al. Single-cell chromatin accessibility reveals principles of regulatory variation.  
361 *Nature* **523**, 486-490 (2015).
- 362 14. Lake, B.B. et al. Integrative single-cell analysis of transcriptional and epigenetic states in the  
363 human adult brain. *Nat Biotechnol* **36**, 70-80 (2018).
- 364 15. Preissl, S. et al. Single-nucleus analysis of accessible chromatin in developing mouse forebrain  
365 reveals cell-type-specific transcriptional regulation. *Nat Neurosci* **21**, 432-439 (2018).
- 366 16. Cusanovich, D.A. et al. Multiplex single cell profiling of chromatin accessibility by combinatorial  
367 cellular indexing. *Science* **348**, 910-914 (2015).
- 368 17. Cusanovich, D.A. et al. The cis-regulatory dynamics of embryonic development at single-cell  
369 resolution. *Nature* **555**, 538-542 (2018).
- 370 18. Bacher, R. et al. SCnorm: robust normalization of single-cell RNA-seq data. *Nat Methods* **14**, 584-  
371 586 (2017).
- 372 19. Butler, A., Hoffman, P., Smibert, P., Papalexi, E. & Satija, R. Integrating single-cell transcriptomic  
373 data across different conditions, technologies, and species. *Nat Biotechnol* **36**, 411-420 (2018).
- 374 20. Kiselev, V.Y. et al. SC3: consensus clustering of single-cell RNA-seq data. *Nat Methods* **14**, 483-486  
375 (2017).
- 376 21. Wang, B., Zhu, J., Pierson, E., Ramazzotti, D. & Batzoglou, S. Visualization and analysis of single-  
377 cell RNA-seq data by kernel-based similarity learning. *Nat Methods* **14**, 414-416 (2017).
- 378 22. Iacono, G. et al. bigSCale: an analytical framework for big-scale single-cell data. *Genome Res* **28**,  
379 878-890 (2018).

- 380 23. Wolf, F.A., Angerer, P. & Theis, F.J. SCANPY: large-scale single-cell gene expression data analysis.  
381 *Genome Biol* **19**, 15 (2018).
- 382 24. Schep, A.N., Wu, B., Buenrostro, J.D. & Greenleaf, W.J. chromVAR: inferring transcription-factor-  
383 associated accessibility from single-cell epigenomic data. *Nat Methods* **14**, 975-978 (2017).
- 384 25. Zamanighomi, M. et al. Unsupervised clustering and epigenetic classification of single cells. *Nat*  
385 *Commun* **9**, 2410 (2018).
- 386 26. Oberst, A. et al. The Nedd4-binding partner 1 (N4BP1) protein is an inhibitor of the E3 ligase Itch.  
387 *Proc Natl Acad Sci U S A* **104**, 11280-11285 (2007).
- 388 27. Eguchi, M. et al. GPHN, a novel partner gene fused to MLL in a leukemia with t(11;14)(q23;q24).  
389 *Genes Chromosomes Cancer* **32**, 212-221 (2001).
- 390 28. Satpathy, A.T. et al. Transcript-indexed ATAC-seq for precision immune profiling. *Nat Med* **24**,  
391 580-590 (2018).
- 392 29. Bendall, S.C. et al. Single-cell trajectory detection uncovers progression and regulatory  
393 coordination in human B cell development. *Cell* **157**, 714-725 (2014).
- 394 30. Trapnell, C. et al. The dynamics and regulators of cell fate decisions are revealed by  
395 pseudotemporal ordering of single cells. *Nat Biotechnol* **32**, 381-386 (2014).
- 396 31. Qiu, X. et al. Reversed graph embedding resolves complex single-cell trajectories. *Nat Methods*  
397 **14**, 979-982 (2017).
- 398 32. Setty, M. et al. Wishbone identifies bifurcating developmental trajectories from single-cell data.  
399 *Nat Biotechnol* **34**, 637-645 (2016).
- 400 33. Weinreb, C., Wolock, S. & Klein, A.M. SPRING: a kinetic interface for visualizing high dimensional  
401 single-cell expression data. *Bioinformatics* **34**, 1246-1248 (2018).
- 402 34. Habib, N. et al. Div-Seq: Single-nucleus RNA-Seq reveals dynamics of rare adult newborn neurons.  
403 *Science* **353**, 925-928 (2016).
- 404 35. Olsson, A. et al. Single-cell analysis of mixed-lineage states leading to a binary cell fate choice.  
405 *Nature* **537**, 698-+ (2016).
- 406 36. Zhou, F. et al. Tracing haematopoietic stem cell formation at single-cell resolution. *Nature* **533**,  
407 487-+ (2016).
- 408 37. Treutlein, B. et al. Dissecting direct reprogramming from fibroblast to neuron using single-cell  
409 RNA-seq. *Nature* **534**, 391-+ (2016).
- 410 38. Buenrostro, J.D. et al. Integrated Single-Cell Analysis Maps the Continuous Regulatory Landscape  
411 of Human Hematopoietic Differentiation. *Cell* **173**, 1535-1548 e1516 (2018).
- 412 39. Adolfsson, J. et al. Identification of Flt3+ lympho-myeloid stem cells lacking erythro-  
413 megakaryocytic potential a revised road map for adult blood lineage commitment. *Cell* **121**, 295-  
414 306 (2005).
- 415 40. Chistiakov, D.A., Orekhov, A.N., Sobenin, I.A. & Bobryshev, Y.V. Plasmacytoid dendritic cells:  
416 development, functions, and role in atherosclerotic inflammation. *Front Physiol* **5**, 279 (2014).
- 417 41. Germain, R.N. T-cell development and the CD4-CD8 lineage decision. *Nat Rev Immunol* **2**, 309-322  
418 (2002).
- 419 42. Chen, X. et al. ATAC-seq reveals the accessible genome by transposase-mediated imaging and  
420 sequencing. *Nat Methods* **13**, 1013-1020 (2016).
- 421 43. Chen, X. et al. Joint single-cell DNA accessibility and protein epitope profiling reveals  
422 environmental regulation of epigenomic heterogeneity. *Nat Commun* **9**, 4590 (2018).
- 423 44. Godfrey, D.I., Kennedy, J., Suda, T. & Zlotnik, A. A developmental pathway involving four  
424 phenotypically and functionally distinct subsets of CD3-CD4-CD8- triple-negative adult mouse  
425 thymocytes defined by CD44 and CD25 expression. *J Immunol* **150**, 4244-4252 (1993).
- 426 45. Taniuchi, I. et al. Differential requirements for Runx proteins in CD4 repression and epigenetic  
427 silencing during T lymphocyte development. *Cell* **111**, 621-633 (2002).

- 428 46. Ioannidis, V., Beermann, F., Clevers, H. & Held, W. The beta-catenin--TCF-1 pathway ensures  
429 CD4(+)CD8(+) thymocyte survival. *Nat Immunol* **2**, 691-697 (2001).
- 430 47. Yu, S. et al. The TCF-1 and LEF-1 transcription factors have cooperative and opposing roles in T cell  
431 development and malignancy. *Immunity* **37**, 813-826 (2012).
- 432 48. Sun, Z. et al. Requirement for RORgamma in thymocyte survival and lymphoid organ development.  
433 *Science* **288**, 2369-2373 (2000).
- 434 49. Gerondakis, S., Fulford, T.S., Messina, N.L. & Grumont, R.J. NF-kappaB control of T cell  
435 development. *Nat Immunol* **15**, 15-25 (2014).
- 436 50. Picelli, S. et al. Smart-seq2 for sensitive full-length transcriptome profiling in single cells. *Nat*  
437 *Methods* **10**, 1096-1098 (2013).
- 438 51. Higashi, Y. et al. Impairment of T cell development in deltaEF1 mutant mice. *J Exp Med* **185**, 1467-  
439 1479 (1997).
- 440 52. Heath, H. et al. CTCF regulates cell cycle progression of alphabeta T cells in the thymus. *EMBO J*  
441 **27**, 2839-2850 (2008).
- 442 53. Andres-Barquin, P.J., Hernandez, M.C. & Israel, M.A. Id4 expression induces apoptosis in astrocytic  
443 cultures and is down-regulated by activation of the cAMP-dependent signal transduction pathway.  
444 *Exp Cell Res* **247**, 347-355 (1999).
- 445 54. Carey, J.P., Knowell, A.E., Chinaranagari, S. & Chaudhary, J. Id4 promotes senescence and  
446 sensitivity to doxorubicin-induced apoptosis in DU145 prostate cancer cells. *Anticancer Res* **33**,  
447 4271-4278 (2013).
- 448 55. Surh, C.D. & Sprent, J. T-cell apoptosis detected in situ during positive and negative selection in  
449 the thymus. *Nature* **372**, 100-103 (1994).
- 450 56. Huesmann, M., Scott, B., Kisielow, P. & von Boehmer, H. Kinetics and efficacy of positive selection  
451 in the thymus of normal and T cell receptor transgenic mice. *Cell* **66**, 533-540 (1991).
- 452 57. Shortman, K., Vremec, D. & Egerton, M. The kinetics of T cell antigen receptor expression by  
453 subgroups of CD4+8+ thymocytes: delineation of CD4+8+3(2+) thymocytes as post-selection  
454 intermediates leading to mature T cells. *J Exp Med* **173**, 323-332 (1991).
- 455

456 **FIGURES**

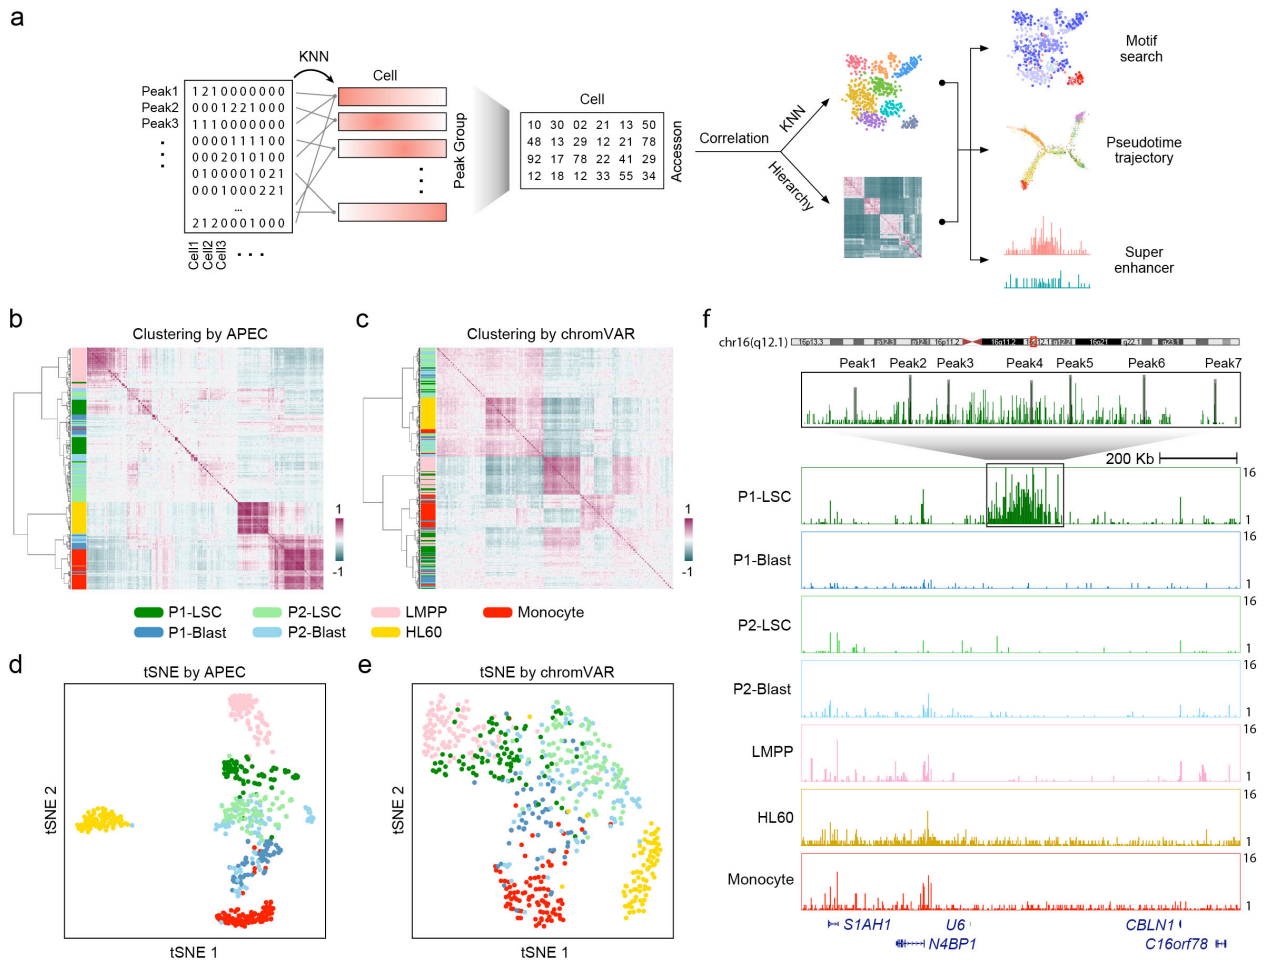

457

458 **Figure 1.** The accession matrix constructed from the sparse fragment count matrix improved the  
 459 clustering of scATAC-seq data. **(a)** Step-by-step workflow of APEC. Peaks were grouped into  
 460 accessions by their accessibility pattern among cells with the K nearest neighbors (KNN) method.  
 461 **(b, c)** Hierarchical clustering of cell-cell correlations based on the accession matrix (from APEC)  
 462 and the motif matrix (from chromVAR). The scATAC-seq data include leukemic stem cells (LSCs),  
 463 leukemia blast cells, lymphoid-primed multipotential progenitors (LMPPs), HL60 cells, and  
 464 monocytes. P1, acute myeloid leukemia (AML) patient 1 (SU070); P2, AML patient 2 (SU353).  
 465 The cells are labeled by their fluorescence indices. **(d, e)** t-Distributed Stochastic Neighbor  
 466 Embedding (tSNE) diagrams based on the accession matrix and the motif matrix. **(f)** Fragment  
 467 counts were specifically enriched in the superenhancer region upstream of N4BP1 in P1-LSCs.

468

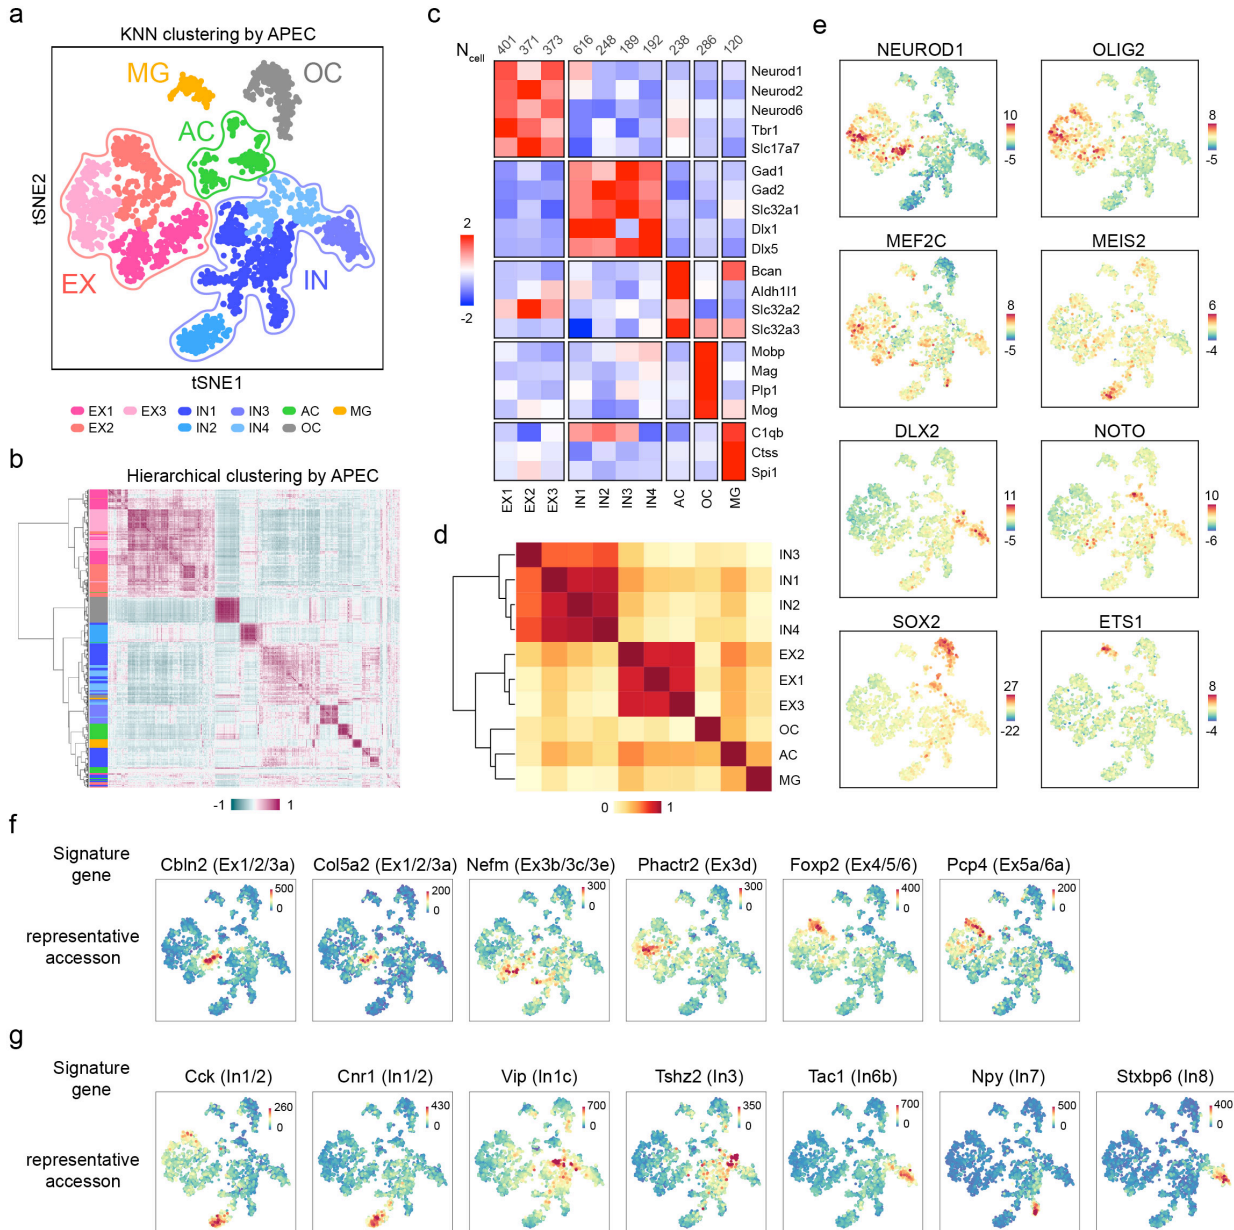

469

470 **Figure 2.** APEC improved the cell type classification of adult mouse forebrain snATAC-seq data.  
 471 (a) A tSNE diagram demonstrates the KNN clustering of forebrain cells. (b) Hierarchical clustering  
 472 of the cell-cell correlation matrix. The side bar denotes cell clusters from the KNN method. (c)  
 473 Average of the marker gene scores for each cell cluster, normalized by the standard score (z-  
 474 score). The top row lists the cell numbers for each cluster. (d) Hierarchical clustering of the cluster-  
 475 cluster correlation matrix. (e) Differential enrichments of cell type-specific motifs in different  
 476 clusters. (f, g) Intensity of representative accessions associated with signature genes of excitatory  
 477 (Ex) and inhibitory (In) neuron subtypes. The subtypes listed in parentheses were defined by the  
 478 signature genes in the results from scRNA-seq data<sup>14</sup>.



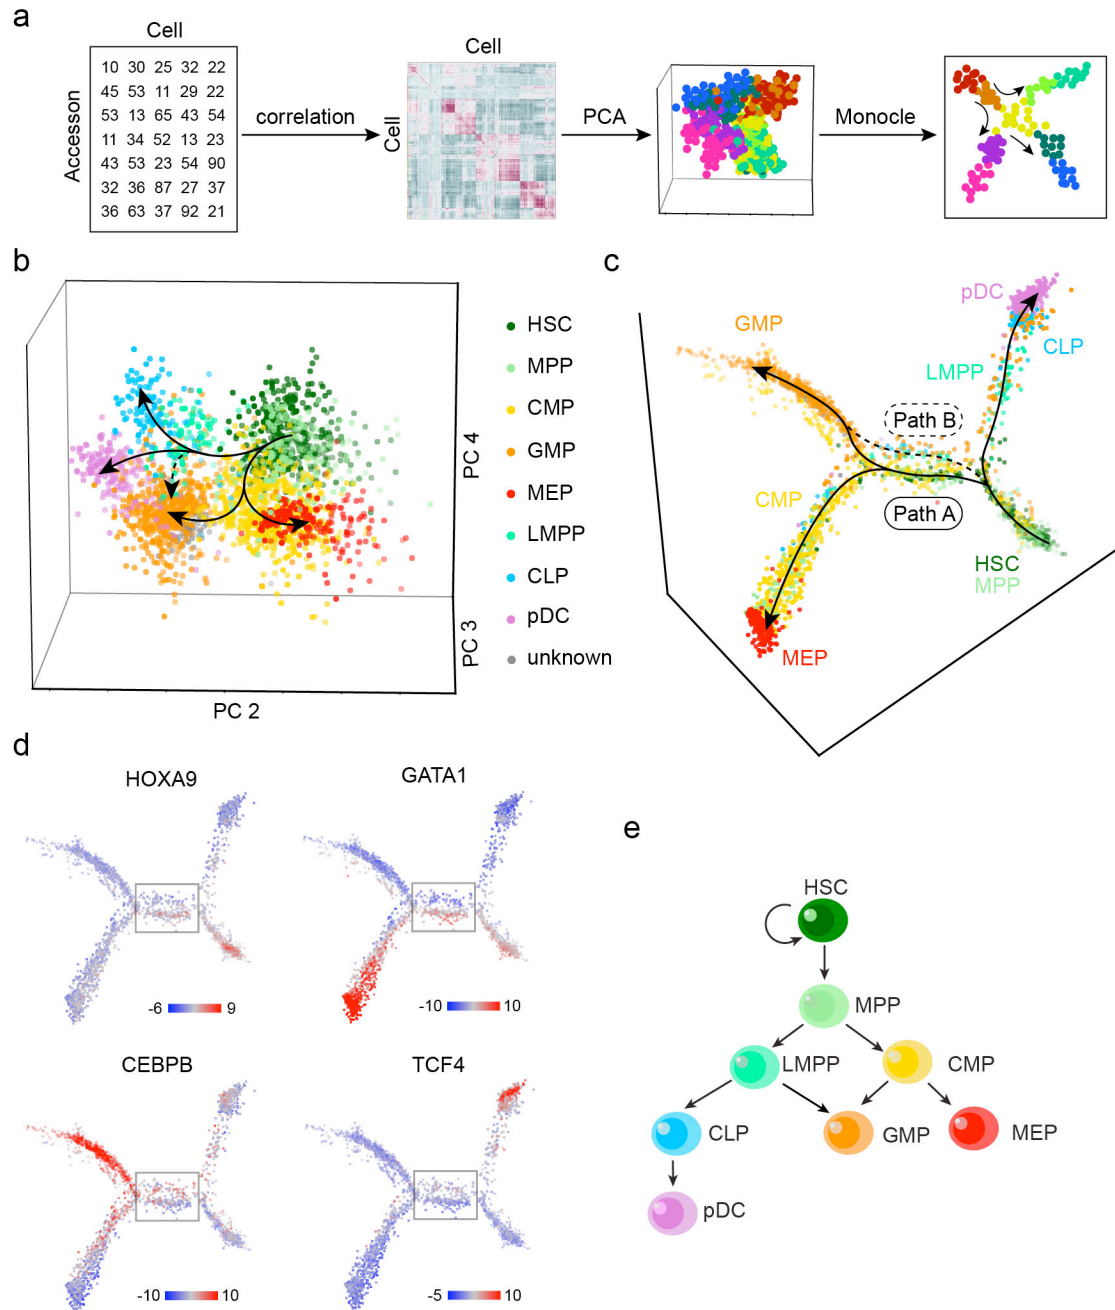

479

480 **Figure 3.** APEC constructed a differentiation pathway from scATAC-seq data from human  
 481 hematopoietic cells. **(a)** The pseudotime trajectory construction scheme based on the accession  
 482 matrix and Monocle. **(b)** Principal component analysis (PCA) of the accession matrix for human  
 483 hematopoietic cells. The first principal component is not shown here because it was highly  
 484 correlated with sequencing depth<sup>38</sup>. HSC, hematopoietic stem cell; MPP, multipotent progenitor;  
 485 LMPP, lymphoid-primed multipotential progenitor; CMP, common myeloid progenitor; CLP,  
 486 common lymphoid progenitor; pDC, plasmacytoid dendritic cell; GMP, granulocyte-macrophage

487 progenitor; MEP, megakaryocyte-erythroid progenitor; unknown, unlabeled cells. **(c)** Pseudotime  
488 trajectory for the same data constructed by calling Monocle on the accession matrix. Paths A and  
489 B represent different pathways for GMP cell differentiation. **(d)** The deviations of significant  
490 differential motifs (HOXA9, GATA1, CEBPB, and TCF4) plotted on the pseudotime trajectory. **(e)**  
491 Modified schematic of human hematopoietic differentiation.

492

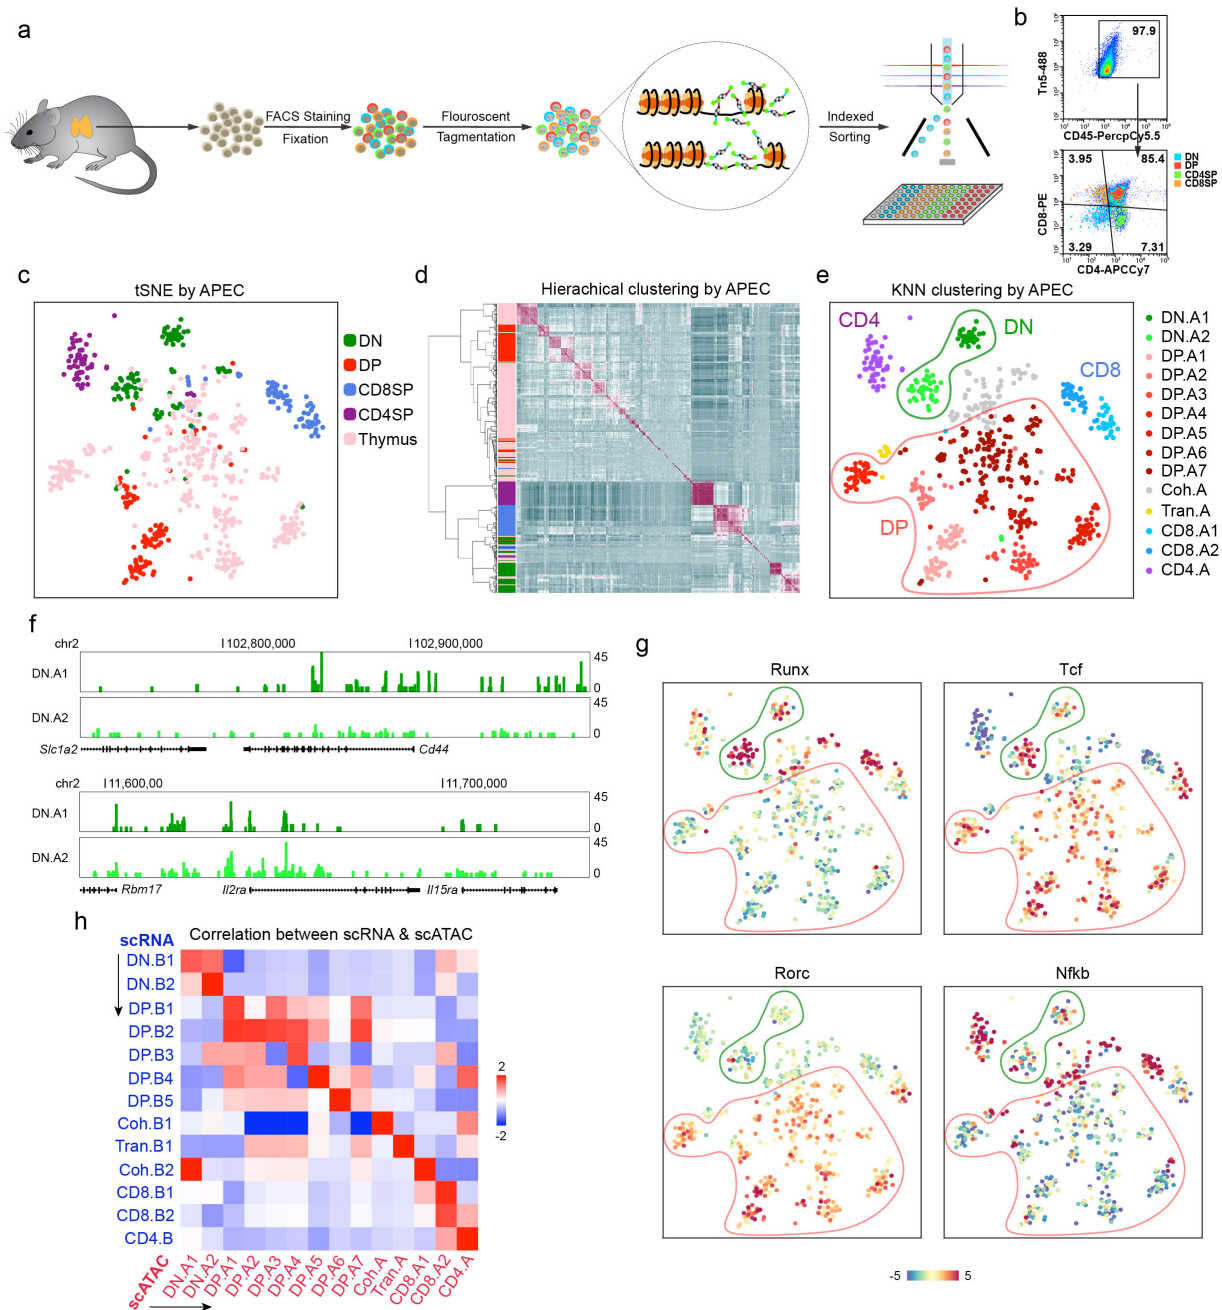

493

494 **Figure 4.** APEC accurately identified cell subtypes based on scATAC-seq data from *Mus*  
 495 *musculus* thymocytes. (a) Experimental workflow of the fluorescent tagmentation- and FACS-  
 496 sorting-based scATAC-seq strategy (ftATAC-seq). (b) Indexed sorting of double-negative (DN),  
 497 double-positive (DP), CD4<sup>+</sup> single-positive (CD4SP), and CD8<sup>+</sup> single-positive (CD8SP) cells with  
 498 strong tagmentation signals. (c) The tSNE of thymocyte single-cell ftATAC-seq data based on the  
 499 accession matrix, in which the cells are labeled by the sorting index. (d) Hierarchical clustering of  
 500 the cell-cell correlation matrix. On the sidebar, each cell was colored by the sorting index. (e) The

501 accesson-based KNN method clustered thymocytes into 14 subtypes. DN.A1&A2, double-  
502 negative clusters; DP.A1~A7, double-positive clusters; Coh.A, coherent state; Tran.A, transition  
503 state; CD8.A1&A2, CD8<sup>+</sup> single-positive clusters; CD4.A, CD4<sup>+</sup> single-positive cluster. (f) Average  
504 fragment counts of two DN clusters around the marker genes Cd44 and Il2ra. (g) Differential  
505 enrichment of the motifs Runx, Tcf, Rorc, and Nfkb in the cell clusters. (h) Correlation of the cell  
506 clusters identified by data from single-cell transcriptome (SMART-seq) and chromatin accessibility  
507 (ftATAC-seq) analysis.

508

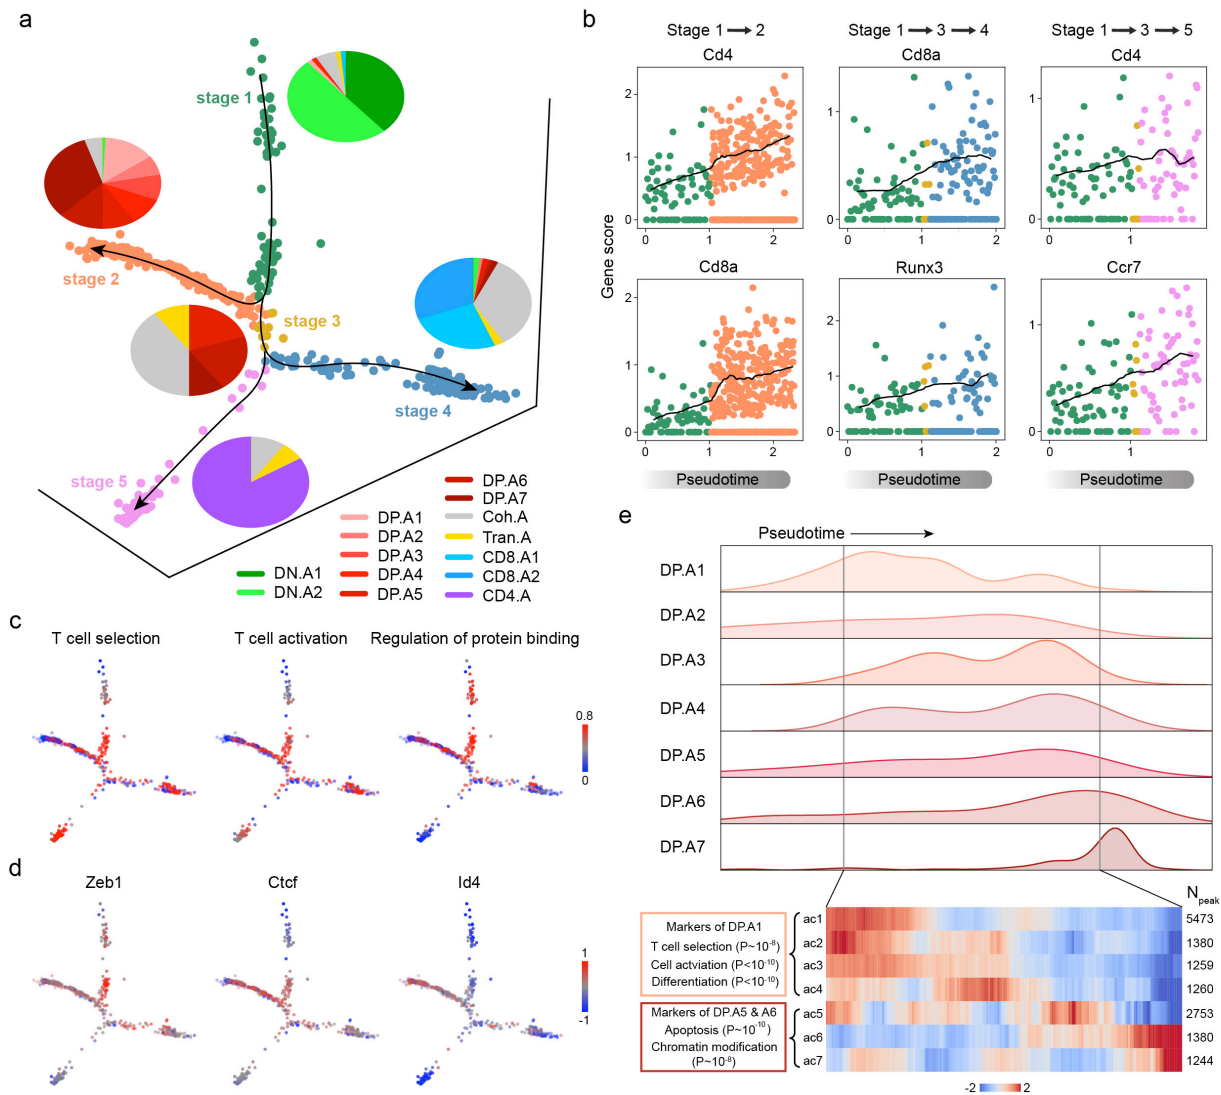

509

510 **Figure 5.** APEC depicted the developmental pathways of *Mus musculus* thymocytes by  
 511 pseudotime analysis. **(a)** Pseudotime trajectory based on the accession matrix of thymocyte  
 512 ftATAC-seq data. Cell colors were defined by the developmental stages along pseudotime. Pie  
 513 charts show the proportion of cell clusters at each stage. **(b)** Normalized scores of important  
 514 marker genes (Cd8a, Cd4, Runx3, and Ccr7) along each branch of the pseudotime trajectory. **(c)**  
 515 Accession weight scores of important functional GO terms along each branch of the pseudotime  
 516 trajectory. **(d)** Enrichment of specific motifs searched from the differential accessions of each cell  
 517 subtype. **(e)** On the stage 2 branch, the cell number distribution of clusters DP.A1~A7 along  
 518 pseudotime (upper panel) and the intensity of marker accessions of DP.A1 and DP.A5/A6 (lower  
 519 panel).

520

## 521 **METHODS**

522 **Mice.** C57BL/6 mice were purchased from Beijing Vital River Laboratory Animal Technology and  
523 maintained under specific pathogen-free conditions until the time of experiments. All mouse  
524 experiments in this study were reviewed and approved by the Institutional Animal Care and Use  
525 Committee of the University of Science and Technology of China.

526 **ftATAC-seq on mouse thymocytes.** Alexa fluor 488-labeled adaptor oligonucleotides were  
527 synthesized at Sangon Biotech as follows: Tn5ME, 5'-[phos]CTGTCTCTTATACACATCT-3';  
528 AF488-R1, 5'-AF488-TCGTCCGCGAGCGTCAGATGTGTATAAGAGACAG-3'; and AF488-R2, 5'-  
529 AF488-GTCTCGTGGGCTCGGAGATGTGTATAAGAGACAG-3'. Then, 50  $\mu$ M of AF488-  
530 R1/Tn5ME and AF488-R2/Tn5ME were denatured separately in TE buffer (Qiagen) at 95 °C for  
531 5 min and cooled down to 22 °C at 0.1 °C/s. AF488-labeled adaptors were assembled onto Robust  
532 Tn5 transposase (Robustnique) according to the user manual to form fluorescent transposomes.

533 Thymus tissues isolated from 6- to 8-week-old male mice were gently ground in 1 mL of RPMI-  
534 1640. Thymocytes in a single-cell suspension were counted after passing through a 40  $\mu$ m nylon  
535 mesh. A total of  $1 \times 10^6$  thymocytes were stained with PerCP-Cy5.5-anti-CD45, PE-anti-CD8a  
536 and APC-Cy7-anti-CD4 antibodies (Biolegend) and then fixed in 1 $\times$  PBS containing 1% methanol  
537 at room temperature for 5 min. After washing twice with 1 $\times$  PBS, the cells were counted again. A  
538 total of  $1 \times 10^5$  fixed cells were resuspended in 40  $\mu$ L of 1 $\times$  TD buffer (5 mM Tris-HCl, pH 8.0, 5  
539 mM MgCl<sub>2</sub>, and 10% DMF) containing 0.1% NP-40. Then, 10  $\mu$ L of fluorescent transposomes  
540 were added and mixed gently. Fluorescent tagmentation was conducted at 55 °C for 30 min and  
541 stopped by adding 200  $\mu$ L of 100 mM EDTA directly to the reaction mixture. The cells were loaded  
542 on a Sony SH800S sorter, and single cells of the CD45<sup>+</sup>/AF488-Tn5<sup>hi</sup> population were index-  
543 sorted into each well of 384-well plates. The 384-well plates used to acquire sorted cells were  
544 loaded with 2  $\mu$ L of release buffer (50 mM EDTA, 0.02% SDS) before use. After sorting, the cells  
545 in the wells were incubated for 1 min. Plates that were not processed immediately were preserved  
546 at -80 °C.

547 To prepare a single-cell ATAC-seq library, plates containing fluorescently tagmented cells were  
548 incubated at 55 °C for 30 min. Then, 4.2  $\mu$ L of PCR round 1 buffer (1  $\mu$ L of 100  $\mu$ M MgCl<sub>2</sub>, 3  $\mu$ L  
549 of 2 $\times$  I-5 PCR mix [MCLAB], and 0.1  $\mu$ L each of 10  $\mu$ M R1 and R2 primers) were added to each  
550 well, followed by PCR: 72 °C for 10 min; 98 °C for 3 min; 10 cycles of 98 °C for 10 s, 63 °C for 30  
551 s and 72 °C for 1 min; 72 °C for 3 min; and holding at 4 °C. Thereafter, each well received 4  $\mu$ L  
552 of PCR round 2 buffer (2  $\mu$ L of I-5 PCR Mix, 0.5  $\mu$ L each of Ad1 and barcoded Ad2 primers, and  
553 1  $\mu$ L of ddH<sub>2</sub>O), and final PCR amplification was carried out: 98 °C for 3 min; 12 cycles of 98 °C

554 for 10 s, 63 °C for 30 s and 72 °C for 1 min; 72 °C for 3 min; and holding at 4 °C. Wells containing  
555 different Ad2 barcodes were collected together and purified with a QIAquick PCR purification kit  
556 (Qiagen). Libraries were sequenced on an Illumina HiSeq X Ten system.

557 **SMART-seq on thymocytes.** Thymocytes were stained and sorted directly into 384-well plates  
558 without fixation. SMART-seq was performed as described with some modifications.<sup>58</sup> Reverse  
559 transcription and the template-switch reaction were performed at 50 °C for 1 hr with Maxima H  
560 Minus Reverse Transcriptase (Thermo Fisher); for library construction, 0.5-1 ng of cDNA was  
561 fragmented with 0.05 µL of Robust Tn5 transposome in 20 µL of TD buffer at 55 °C for 10 min,  
562 then purified with 0.8× VAHTS DNA Clean Beads (Vazyme Biotech), followed by PCR  
563 amplification with Ad1 and barcoded Ad2 primers and purification with 0.6× VAHTS DNA Clean  
564 Beads. Libraries were sequenced on an Illumina HiSeq X Ten system.

565 **Data source.** All experimental raw data used in this paper are available online. The single-cell  
566 data for mouse thymocytes captured by the ftATAC-seq experiment can be obtained from the  
567 Genome Sequence Archive at BIG Data Center with the accession number CRA001267 and is  
568 available via <http://bigd.big.ac.cn/gsa/s/yp1164Et>. Other published data sets used in this study  
569 are available from NIH GEO: (1) scATAC-seq data for LSCs and leukemic blast cells from patients  
570 SU070 and SU353, LMPP cells, and monocytes from GSE74310<sup>3</sup>; (2) scATAC-seq data for HL-  
571 60 cells from GSE65360<sup>13</sup>; and (3) scATAC-seq data for hematopoietic development (HSCs,  
572 MPPs, CMPs, LMPPs, GMPs, EMPs, CLPs and pDCs) from GSE96772<sup>38</sup>. APEC is also  
573 compatible with a preprocessed fragment count matrix from the snATAC-seq data for the  
574 forebrain of adult mice (p56) from GSE100033<sup>15</sup>.

575 **Preparing the fragment count matrix from the raw data.** APEC adopted the general mapping,  
576 alignment, peak calling and motif searching procedures to process the scATAC-seq data. To trim  
577 the adapters in the raw data (in paired-end fastq format files for each single-cell sample), we  
578 implanted the python version trimming code from our previous published pipeline (ATAC-pipe)<sup>59</sup>.  
579 Then, APEC used BOWTIE2 to map the trimmed sequencing data to the corresponding genome  
580 index and used PICARD for the sorting, duplicate removal, and fragment length counting of the  
581 aligned data. The pipeline called peaks from the merged file of all cells by MACS2, ranked and  
582 filtered out the low quality peaks based on the false discovery rate (Q-value). Genomic locations  
583 of the peaks were annotated by HOMER, and motifs searched by FIMO. APEC calculates the  
584 number of fragments and the percent of reads mapped to the TSS region (±2000 BP) for each  
585 cell, and filters out high quality cells for downstream analysis. All required files for the hg19 and  
586 mm10 assembly have been integrated into the pipeline. If users want to process data from other

587 species, they can also download corresponding reference files from the UCSC website. By  
588 combining existing tools, APEC made it possible to finish all of the above data processing steps  
589 by one command line, and generate a fragment count matrix for subsequent cell clustering and  
590 differential analysis.

591 **Accession-based clustering algorithm.** We define accession as a set of peaks with similar  
592 accessibility patterns across all single cells, similar to the definition of gene modules for RNA-seq  
593 data. The peaks of a same accession can be distant from each other on the genome, and  
594 sometimes on multiple chromosomes. After preprocessing, a filtered fragment count matrix  $\mathbf{M}$  is  
595 obtained, and APEC groups peaks to construct accessions and then performs cell clustering  
596 analysis as follows:

597 (1) Normalization of the fragment count matrix. Each matrix element  $M_{ij}$  represents the  
598 number of raw reads in cell  $i$  and peak  $j$ , and element  $M_{ij}$  was then normalized by the  
599 total number of reads in each cell  $i$ , as if there are 10,000 reads in each cell.

$$600 \quad M'_{ij} = \log_2 \left( \frac{M_{ij} \times 10000}{\sum_{j'} M_{ij'}} + 1 \right)$$

601 (2) Constructing accessions. The top 40 principal components of the normalized matrix  $\mathbf{M}'$   
602 were used to construct the connectivity matrix ( $\mathbf{C}_{\text{peak}}$ ) of peaks by the K-nearest-neighbor  
603 (KNN) method. Based on the matrix  $\mathbf{C}_{\text{peak}}$ , all peaks were grouped by agglomerative  
604 clustering with the Ward's method, and the sum of one peak group was an accession. In  
605 processing of all datasets in this study, the default number of accessions was set to 600.  
606 We recommend using a flexible number of accessions so that you can accumulate enough  
607 peaks in one accession while avoiding incorrect grouping of differential peaks. However,  
608 not all accessions were used for cell clustering in the next step. Sparse accessions with 4  
609 or fewer peaks were discarded since they will interfere with the clustering accuracy. Only  
610 accessions containing 5 or more peaks were retained in the accession count matrix  $\mathbf{M}_a$ .  
611 Each row of  $\mathbf{M}_a$  is an accession, each column is a cell and the elements of  $\mathbf{M}_a$  represents  
612 the cumulative read counts of each accession in each cell. If less than 30% of the  
613 accessions contain enough number of peaks, the users may consider to reduce the default  
614 accession number to avoid sparse accessions.

615 (3) Cell clustering. From the accession matrix  $\mathbf{M}_a$ , APEC calculated the Pearson correlation  
616 between each pair of cells, and then performed both hierarchical and KNN clustering on  
617 the correlation matrix to categorize cells into different clusters. The number of cell clusters  
618 can be predicted by the Louvain method, or inputted by the users. By default, cell



619 clustering was performed in the high-dimensional PCA transformed space, but also  
620 supports clustering in the tSNE space.

621 (4) Comparison with other clustering methods. To investigate the accuracy of clusters  
622 generated by different algorithms, APEC provides two ways to compare cell clusters: a)  
623 The contingency matrix, in which each element represents the number of common cells  
624 between two clusters from different methods (e.g., hierarchy and KNN clustering, or  
625 accession-based and motif-based clustering); b) The ARI value, which evaluates the  
626 similarity of clustering results from two different algorithms<sup>20</sup>. Moreover, one clustering  
627 method can be compared with known cell types in the original single-cell data (such as  
628 the FACS index) to confirm the accuracy of the cell type classification algorithm.

629 **Gene score evaluated by peaks around the TSS.** To evaluate the accessibility score of one  
630 gene, we calculated the average count of all peaks around its TSS ( $\pm 20000$  BP) as its raw score  
631 ( $S_{ij}$  for cell  $i$  and gene  $j$ ). Then, we obtained the gene accessibility score by normalizing the raw  
632 score ( $S'_{ij} = S_{ij} * 10000 / \sum_i S_{ij}$ ), which is in a range comparable to the gene expression from  
633 scRNA-seq data. The average score of all cells in one cluster represents the accessibility of a cell  
634 type ( $\bar{S}_{kj}$  for cell cluster  $k$  and gene  $j$ ). We normalized the gene score matrix  $\bar{S}$  by calculating z-  
635 score for each row and column, and the final matrix  $\bar{S}_z$  represents the relative strength of gene  
636 accessibility for each cell type.

637 **Significant differential peaks, genes and motifs.** APEC used the Student's t-test to estimate  
638 the significance of the fragment count differences between cell clusters, with P-value and fold  
639 changes, and one can determine the thresholds to identify significant differential peaks for each  
640 cluster. The significant differential genes of each cell cluster can also be acquired from the  
641 accessibility score ( $\bar{S}_{kj}$ ) by the same method. To accurately quantify the enrichment of motifs on  
642 each cell, APEC applied the bias-corrected deviation algorithm from chromVAR<sup>24</sup>; thus, the  
643 chromVAR algorithm has been embedded into the pipeline to facilitate the calculation of the  
644 corrected deviation of the motifs. In this python version of chromVAR, permuted sampling and  
645 background deviation calculation can be run in parallel on multiple processors to reduce the  
646 computer time. The differentially enriched motifs were defined by a fold change  $> 1$  in the average  
647 motif deviation between one cluster and another.

648 **Potential super-enhancers.** Here, we defined a super-enhancer as a long continuous genomic  
649 area containing many accessible regions and have the same accessibility pattern in different cells.  
650 Many different motifs appear in one super-enhancer, therefore, the motif-based clustering method

651 cannot reflect the critical contributions from super-enhancers for cell clustering. However, the  
652 accesson-based algorithm can group most peaks in one super-enhancer to one accesson since  
653 they always present the same accessibility pattern between cells. APEC identified super-  
654 enhancers by counting the number of peaks in a 1 million BP genomic area that belong to a same  
655 accesson. It also requires that more than 3/4 of the putative peaks in one super-enhancer be  
656 adjacent on the initial peak list. The pipeline can also aggregate bam files by cell types/clusters  
657 and convert them to BigWig format for users to upload to the UCSC genome browser for  
658 visulization.

659 **Pseudotime trajectory.** As a tool to simulate the time-dependent variation of gene expression  
660 and the cell development pathway, Monocle has been widely used for the analysis of single-cell  
661 RNA-seq experiments<sup>30, 60</sup>. APEC reduced the dimension of the accesson count matrix  $\mathbf{M}_a$  by  
662 PCA, and then performed pseudotime analysis using the Monocle program. For complex datasets,  
663 it is necessary to limit the number of principal components, since too many features will cause  
664 too many branches on the pseudo-time trajectory, and makes it difficult for a user to identify the  
665 biological significance of each branch. For the hematopoietic single cell data and thymocyte data,  
666 we used the top 5 principal components of the accesson matrix to construct the developmental  
667 and differentiation trajectories.

668 **Parameter settings for each analysis.** In the quality control (QC) step, cells are filtered by two  
669 constraints: the percentage of the fragments in peaks ( $P_f$ ) and the total number of valid fragments  
670 ( $N_f$ ). However, there is no fixed cutoff for these two parameters since the quality of different cell  
671 types and/or experiment batches are completely different. The total number of peaks is usually  
672 limited to approximately 50000 to reduce computer time, but we recommend using all peaks if the  
673 users want to obtain better cell clusters. (1) For the scATAC-seq data from leukemic cells (P1/P2  
674 LSCs and blast cells, LMPPs, HL60 cells, and monocytes), the threshold of  $-\log(Q\text{-value})$  was set  
675 to 8 to retain 42139 high-quality peaks for subsequent processing. In the QC step, we set the  $P_f$   
676 cutoff to 0.05 and the  $N_f$  cutoff to 800. (2) For the snATAC-seq data from the adult mouse forebrain,  
677 all peaks and the raw count matrix obtained from the original data source were adopted in the  
678 analysis. (3) For the data set from hematopoietic cells, the  $-\log(Q\text{-value})$  threshold of high-quality  
679 peaks was set to 35 to retain 54212 peaks, and the cutoff values of  $P_f$  and  $N_f$  were 0.1 and 1000,  
680 respectively. (4) For the ftATAC-seq data from thymocytes, all 130685 peaks called by MACS2  
681 were reserved for the fragment count matrix ( $Q\text{-value} < 0.05$ ), and we retained cells with  $P_f > 0.2$   
682 and  $N_f > 2000$ .

683 **SMART-seq data analysis with Seurat.** For the analysis of SMART-seq data from mouse  
684 thymocytes, we employed STAR (version 2.5.2a) with the ratio of mismatches to mapped length  
685 (outFilterMismatchNoverLmax) less than or equal to 0.05, translated output alignments into  
686 transcript coordinates (i.e., quantMode TranscriptomeSAM) for mapping<sup>61</sup> (Dobin et al., 2013) and  
687 used RSEM<sup>62</sup> (Bo et al., 2011) to calculate the TPM of genes. For QC, we excluded cells in which  
688 fewer than 2000 genes were detected and genes that were expressed in only 3 or fewer cells.  
689 Seurat filtered cells with several specific parameters to limit the number of genes detected in each  
690 cell to 2000~6000 and the proportion of mitochondrial genes in each cell was set to less than 0.4  
691 (i.e., low.thresholds=c(2000,-Inf), high.thresholds=c(6000,0.4)). Additionally, the top 12 principal  
692 components were used for dimension reduction with a resolution of 3.2 (dims.use =1:12,  
693 resolution=3.2), followed by cell clustering and differential expressed gene analysis<sup>63</sup>.

694 **Association of cell clusters from scATAC-seq and scRNA-seq data.** To determine the  
695 association between cell clusters from epigenomics and transcriptome sequencing, we calculated  
696 the P-values of Fisher's exact test of marker/nonmarker genes between each pair of cell clusters  
697 from scATAC-seq and scRNA-seq data. For example, for cell cluster  $i$  from scATAC-seq and cell  
698 cluster  $j$  from SMART-seq, if the number of consensus marker genes in both cluster  $i$  and  $j$  is  $G_{11}$ ,  
699 the number of genes that are not markers in either cluster  $i$  or  $j$  is  $G_{22}$ , and the number of markers  
700 in either cluster  $i$  (or cluster  $j$ ) is  $G_{12}$  (or  $G_{21}$ ), then the 2 by 2 matrix  $\mathbf{G}$  can be directly used for  
701 Fisher's exact test to evaluate the P-value  $A_{ij}$  between cluster  $i$  and  $j$ . We calculated the logarithm  
702 of matrix  $\mathbf{A}$  to obtain matrix  $\mathbf{A}'$ , then calculated the z-score for each row and column of  $\mathbf{A}'$  to  
703 determine the correlation of cell clusters from different experiments.

704 **Biological function of accessions.** We defined the functional characteristics of each accession by  
705 the GO terms and motifs enriched on its peaks. The GO terms of an accession were obtained by  
706 submitting all of its peaks to the GREAT website<sup>64</sup>. The logarithm of the P-value of each GO term  
707 in each accession was filled into a (GO terms)  $\times$  (accessions) matrix  $\mathbf{L}$ . The significance of each  
708 GO term on each cell was evaluated by the product of the matrix  $\mathbf{L}$  and the accession reads count  
709 matrix  $\mathbf{M}_a$ . Then we calculated the z-score for each row of this product matrix, and plotted the z-  
710 score as the GO-term score on the trajectory diagram. To assess the motif enrichment of the  
711 accessions, we used the Centrimo tool of MEME suite<sup>65</sup> to search for the enriched motifs for the  
712 peaks of each accession, and applied the same algorithm as the GO term score to obtain the motif  
713 score.

714

715   **REFERENCES**

- 716   58.    Picelli, S. et al. Full-length RNA-seq from single cells using Smart-seq2. *Nat Protoc* **9**, 171-181  
717        (2014).
- 718   59.    Zuo, Z. et al. ATAC-pipe: general analysis of genome-wide chromatin accessibility. *Briefings in*  
719        *Bioinformatics*, bby056-bby056 (2018).
- 720   60.    Qiu, X. et al. Single-cell mRNA quantification and differential analysis with Census. *Nat Methods*  
721        **14**, 309-315 (2017).
- 722   61.    Dobin, A. et al. STAR: ultrafast universal RNA-seq aligner. *Bioinformatics* **29**, 15-21 (2013).
- 723   62.    Li, B. & Dewey, C.N. RSEM: accurate transcript quantification from RNA-Seq data with or without  
724        a reference genome. *Bmc Bioinformatics* **12**, 323 (2011).
- 725   63.    Macosko, E.Z. et al. Highly Parallel Genome-wide Expression Profiling of Individual Cells Using  
726        Nanoliter Droplets. *Cell* **161**, 1202-1214 (2015).
- 727   64.    McLean, C.Y. et al. GREAT improves functional interpretation of cis-regulatory regions. *Nat*  
728        *Biotechnol* **28**, 495-501 (2010).
- 729   65.    Bailey, T.L. et al. MEME SUITE: tools for motif discovery and searching. *Nucleic Acids Res* **37**, W202-  
730        208 (2009).

731

732
